# Supplementary material
Source: Springer Nature journal article supplement (https://www.springermedizin.de/resource/supplementary/12881_2007_272_MOESM3_ESM.pdf/9452776)
Supplement: MOESM3 [file 9452776]

| Category  | Subject / Family | Right Hand |   |   |   |   | Left Hand |   |   |   |   | Right Foot |   |   |   |   | Left Foot |   |   |   |   | Genotypes<br>(bp)* |         |
|-----------|------------------|------------|---|---|---|---|-----------|---|---|---|---|------------|---|---|---|---|-----------|---|---|---|---|--------------------|---------|
|           |                  | 5          | 4 | 3 | 2 | 1 | 1         | 2 | 3 | 4 | 5 | 5          | 4 | 3 | 2 | 1 | 1         | 2 | 3 | 4 | 5 |                    |         |
| A         | VIII-45 P        |            |   |   |   |   |           |   |   |   |   |            |   |   |   |   |           |   |   |   |   | 468 489            |         |
|           | VIII-21 P        |            |   |   |   |   |           |   |   |   |   |            |   |   |   |   |           |   |   |   |   | 468 489            |         |
|           | VIII-50 P        |            |   |   |   |   |           |   |   |   |   |            |   |   |   |   |           |   |   |   |   | 468 489            |         |
|           | IX-25 P          |            |   |   |   |   |           |   |   |   |   |            |   |   |   |   |           |   |   |   |   | - -                |         |
|           | IX-26 P          |            |   |   |   |   |           |   |   |   |   |            |   |   |   |   |           |   |   |   |   | - -                |         |
|           | VII-25 P         |            |   |   |   |   |           |   |   |   |   |            |   |   |   |   |           |   |   |   |   | 474 489            |         |
|           | VIII-43 P        |            |   |   |   |   |           |   |   |   |   |            |   |   |   |   |           |   |   |   |   | 468 489            |         |
|           | IX-23 P          |            |   |   |   |   |           |   |   |   |   |            |   |   |   |   |           |   |   |   |   | 474 489            |         |
|           | V-6 I            |            |   |   |   |   |           |   |   |   |   |            |   |   |   |   |           |   |   |   |   | - -                |         |
|           | IV-7 I           |            |   |   |   |   |           |   |   |   |   |            |   |   |   |   |           |   |   |   |   | 468 489            |         |
|           | V-4 I            |            |   |   |   |   |           |   |   |   |   |            |   |   |   |   |           |   |   |   |   | 468 489            |         |
|           | V-3 I            |            |   |   |   |   |           |   |   |   |   |            |   |   |   |   |           |   |   |   |   | 474 489            |         |
|           | B                | IX-20 P    |   |   |   |   |           |   |   |   |   |            |   |   |   |   |           |   |   |   |   |                    | 489 489 |
|           |                  | VIII-19 P  |   |   |   |   |           |   |   |   |   |            |   |   |   |   |           |   |   |   |   |                    | 468 489 |
| VIII-20 P |                  |            |   |   |   |   |           |   |   |   |   |            |   |   |   |   |           |   |   |   |   | 468 489            |         |
| VIII-35 P |                  |            |   |   |   |   |           |   |   |   |   |            |   |   |   |   |           |   |   |   |   | 468 489            |         |
| VIII-44 P |                  |            |   |   |   |   |           |   |   |   |   |            |   |   |   |   |           |   |   |   |   | 468 489            |         |
| V-5 I     |                  |            |   |   |   |   |           |   |   |   |   |            |   |   |   |   |           |   |   |   |   | - -                |         |
| C         | III-3 I          |            |   |   |   |   |           |   |   |   |   |            |   |   |   |   |           |   |   |   |   | - -                |         |
|           | VIII-24 P        |            |   |   |   |   |           |   |   |   |   |            |   |   |   |   |           |   |   |   |   | 468 489            |         |
| D         | VIII-24 P        |            |   |   |   |   |           |   |   |   |   |            |   |   |   |   |           |   |   |   |   | 468 489            |         |

**Legends:**

normal digits

cutaneous webbing

bony syndactyly

metacarpal/metatarsal synostosis

polydactyly

bony fusion with additional digital elements

clino-, brachy- or camptodactyly

partial metatarsal duplication

\* genotypes are according to Figures 1 and 4
